# Supplementary material for: A novel magnetite C18/paracetamol/alginate adsorbent bead for simultaneous extraction of synthetic antioxidants and bisphenol A in water samples
Source: Royal Society of Chemistry journal article supplement (doi:10.1039/d4ra02720e), 2024-01-01
Supplement: d4ra02720e1.pdf [file d4ra02720e1.pdf]

## Electronic Supplementary Information (ESI)

### **A novel magnetite C18/paracetamol/alginate adsorbent bead for simultaneous extraction of synthetic antioxidants and bisphenol A in water samples**

Nurma Sulaiman,<sup>ab</sup> Nuryanee Hama,<sup>ab</sup> Saowanit Saithong<sup>a</sup> and Thitima Rujiralai<sup>\*ab</sup>

<sup>a</sup> *Center of Excellence for Innovation in Chemistry and Division of Physical Science, Faculty of Science, Prince of Songkla University, Songkhla, 90110, Thailand. E-mail: thitima.r@psu.ac.th*

<sup>b</sup> *Analytical Chemistry and Environment Research Unit, Division of Science, Faculty of Science and Technology, Prince of Songkla University, Pattani, 94000, Thailand.*

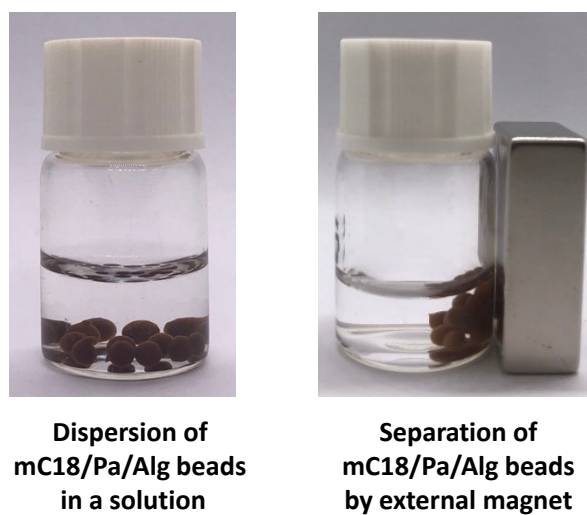

**Fig. S1** Dispersion and separation of the beads. The beads are easily separated from the water by an external magnet.

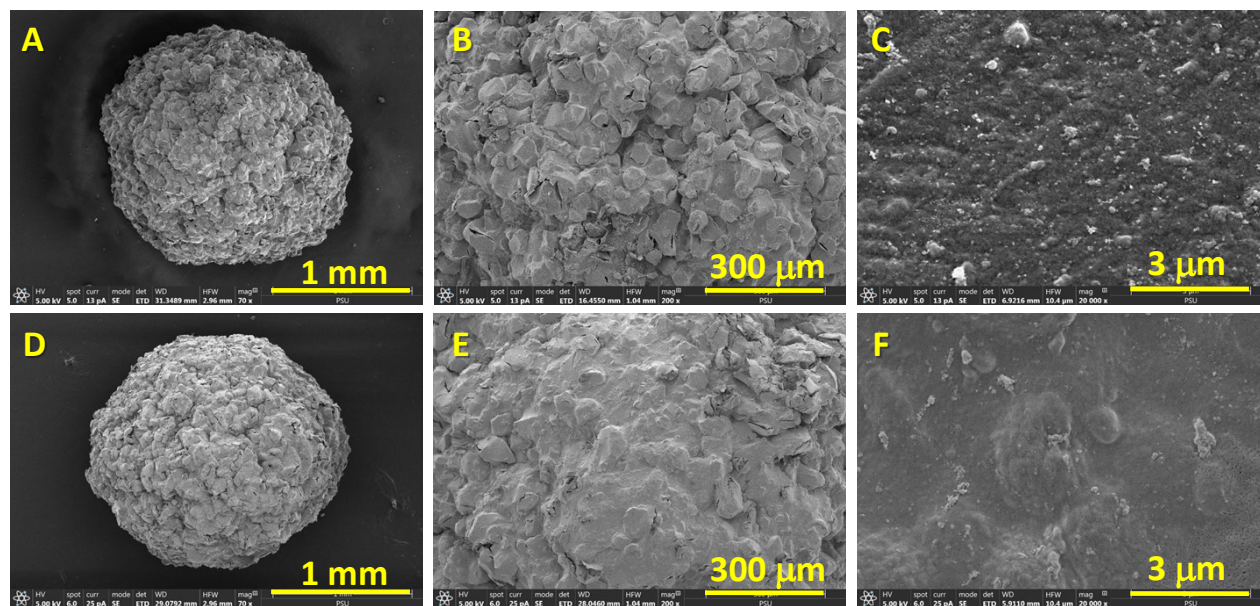

**Fig. S2** FE-SEM images show (A–C) the mC18/Pa/Alg bead (with Pa), and (D–F) the mC18/Alg bead (without Pa) at 70X, 200X, and 20,000X magnifications, respectively. Pa stands for paracetamol.

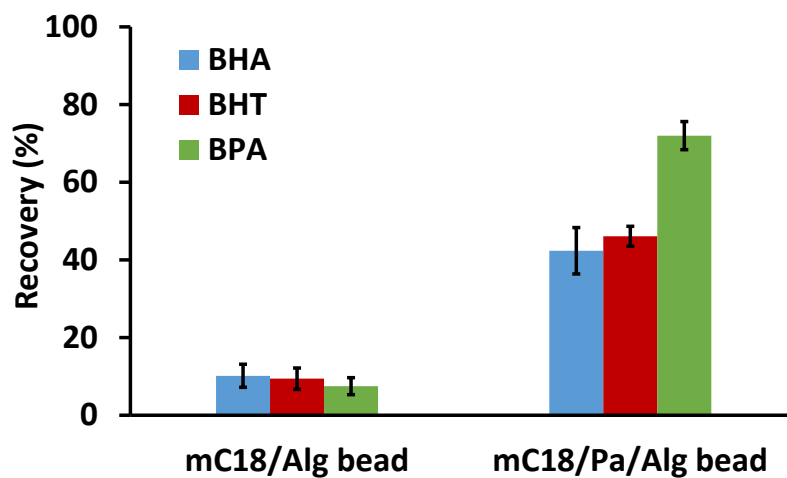

**Fig. S3** Comparison of the extraction efficiency of BHT, BHA and BPA between the mC18/Alg bead (without Pa) and the mC18/Pa/Alg bead (with Pa).

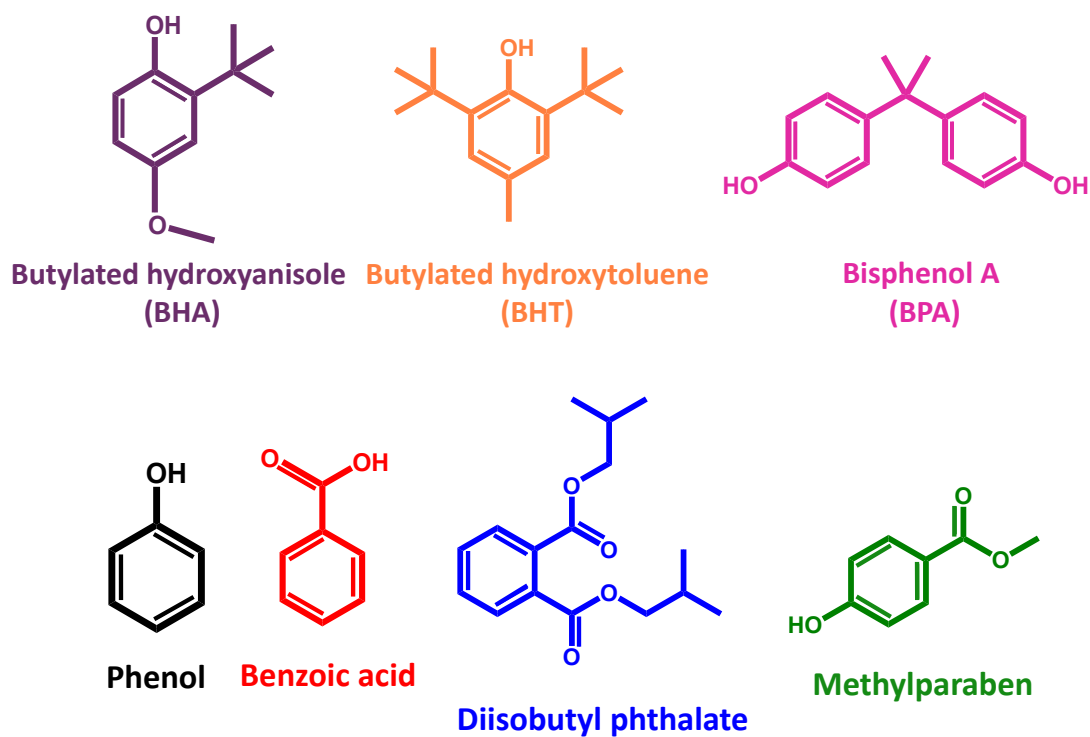

**Fig. S4** Chemical structures of competitive aromatic compounds.

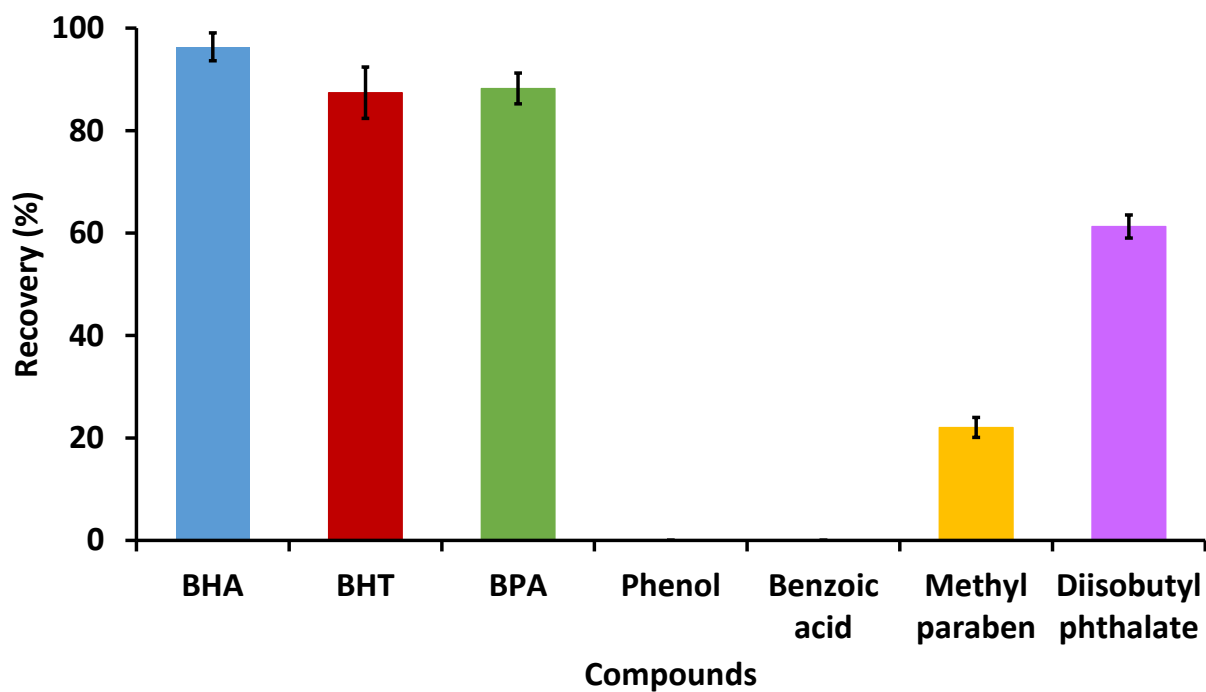

**Fig. S5** The selectivity of BHA, BHT, BPA and competitive aromatic compounds.

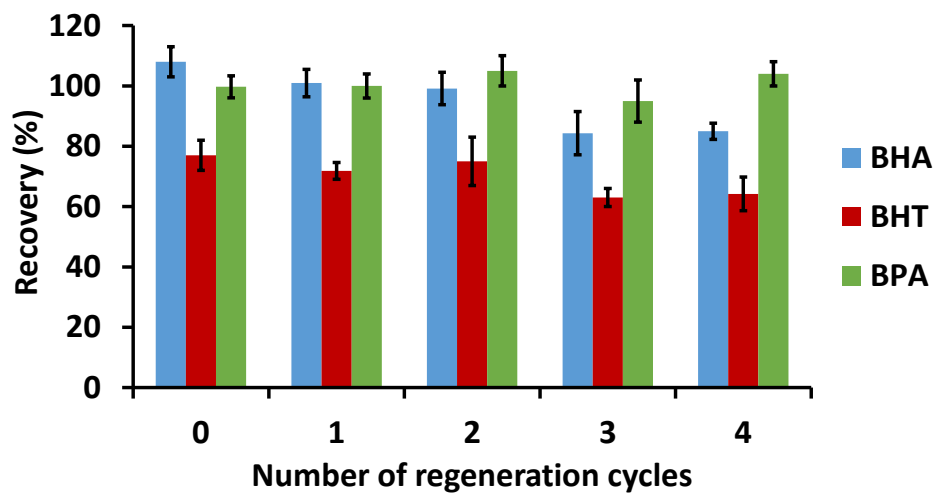

**Fig. S6** Extraction recovery (%) of mC18/Pa/Alg during four regeneration cycles.

### The adsorption capacity

The adsorption capacity was conducted as follows: the highest concentration of 0.5  $\mu\text{g mL}^{-1}$  of standard mixture used to spike in real water samples was tested. The adsorption study was conducted in a 7-mL glass vial and optimal amounts of mC18/Pa/Alg beads (300 mg) were added into 3 mL water samples ( $n = 3$ ). The solution was shaken for 30 min to allow the adsorption of analytes. Subsequently, the beads were isolated from the solution with a magnet. The residual concentration of BHA, BHT and BPA in the adsorbed solution was analyzed by UV-visible spectrophotometry. The equilibrium adsorption capacity,  $q_e$  ( $\text{mg g}^{-1}$ ) was calculated as follows:

$$q_e = \frac{(C_0 - C_e)V}{m}$$

where  $C_0$  is the concentration in the original solution ( $\text{mg L}^{-1}$ ),  $C_e$  is the concentration in the adsorbed solution ( $\text{mg L}^{-1}$ ),  $V$  is the adsorption volume (L) and  $m$  is the dry weight of the beads (g).<sup>1</sup>

### Reference

1. X. Zhang, T. Zeng, S. Wang, H. Niu, Xi. Wang and Y. Cai, One-pot synthesis of C<sub>18</sub>-functionalized core-shell magnetic mesoporous silica composite as efficient sorbent for organic dye, *J. Colloid Interface Sci.*, 2015, **448**, 189–196, DOI: 10.1016/j.jcis.2015.02.029.

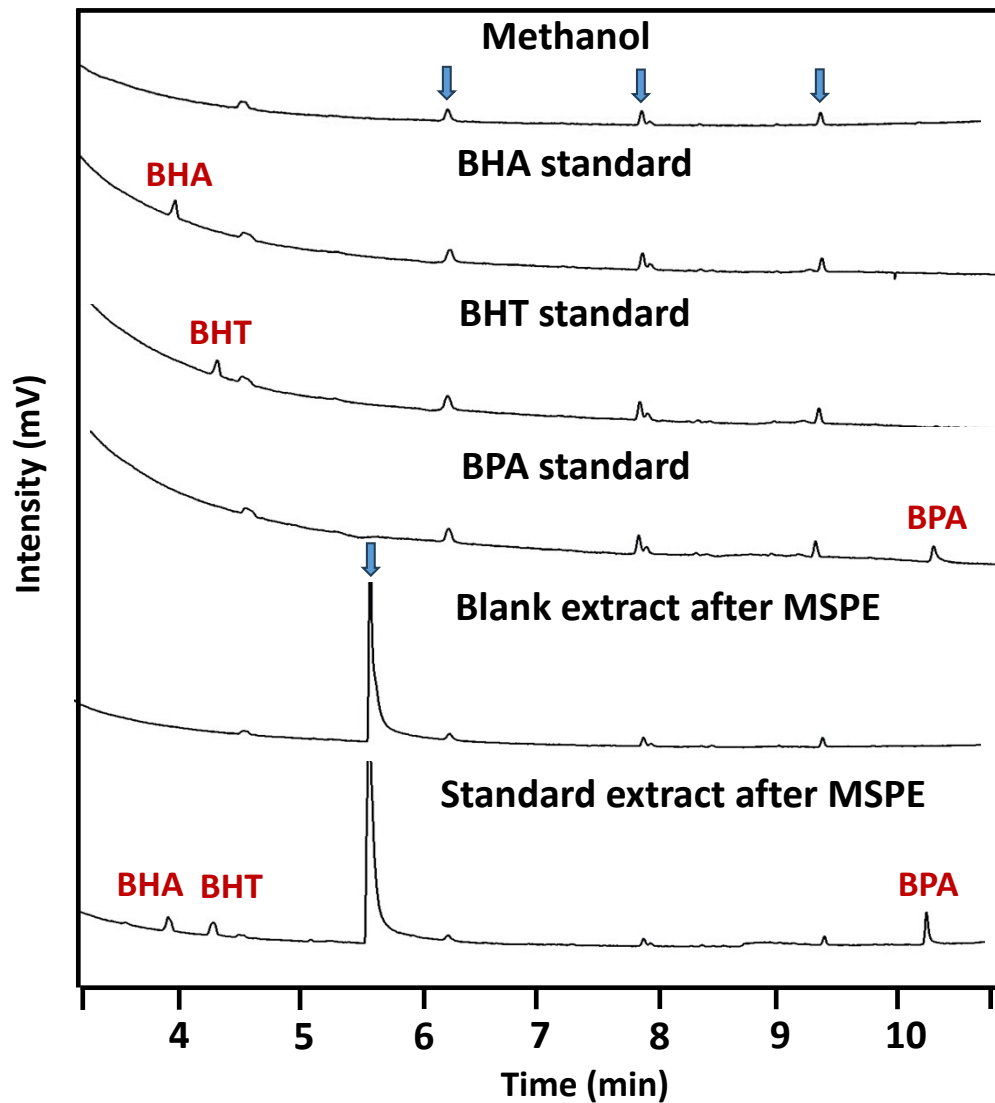

**Fig. S7** GC-FID chromatograms of methanol, a standard solution (single BHA, BHT and BPA), a treated blank extract after MSPE and a treated standard extract after MSPE.
